# Supplementary material
Source: publisher figshare collection journal article supplement (https://tandf.figshare.com/ndownloader/files/15235499)
Supplement: Supplementary file 1 [file 15235499]

Supplemental Material

Figure 1.1

<https://www.instagram.com/p/ys569kvNyBI9_vBQ_PmRScIBLitZ_7osQTeCk0/?taken-by=therichkidsoftehran>

Figure 1.2

<https://www.instagram.com/p/8W3OVuPN34yk36xjz7gGTR1DTsdroLw8wNIjk0/?taken-by=therichkidsoftehran>

Figure 1.3

<https://www.instagram.com/p/vqk8TCvN1WZtZHX6lN7GHxz1Jp4i81FIxgmCo0/?taken-by=therichkidsoftehran>

Figure 1.4

<https://www.instagram.com/p/0iOcnFvNzFpVE3e0k7JIcmJgdHM06LOfAkS0Q0/?taken-by=therichkidsoftehran>

Figure 1.5

<https://www.instagram.com/p/0zFbp6PNx8EkqIgEYtewnnjrBdIzoIh9kvXTg0/?taken-by=therichkidsoftehran>

Figure 1.6

<https://www.instagram.com/p/yUw4cOPNz5STlf4KKcVBcmv0AWOX7eDHRxJFI0/?taken-by=therichkidsoftehran>

Figure 2.1

<https://www.instagram.com/p/x5ic1MPN69oQm9gVFgiEtHV3yl6BDx89V2KsA0/?taken-by=therichkidsoftehran>

Figure 2.2

<https://www.instagram.com/p/xCfoMzvN1JuVqUA-LL25YsoAFZGo45lXg-Vtg0/?taken-by=therichkidsoftehran>

Figure 3.1

<https://www.instagram.com/p/-OahpFPN9h-rDFzVwJZm_v9xND4933I8ijdbU0/?taken-by=therichkidsoftehran>

Figure 3.2

No longer available on Instagram

Figure 3.3

No longer available on Instagram
